# Supplementary material
Source: PubMed Central journal article supplement (PMC9715480)
Supplement: mmc1.pdf [file mmc1.pdf]

**Supplemental information**

**SARS-CoV-2 replication in airway epithelia  
requires motile cilia and microvillar reprogramming**

**Chien-Ting Wu, Peter V. Lidsky, Yinghong Xiao, Ran Cheng, Ivan T. Lee, Tsuguhisa Nakayama, Sizun Jiang, Wei He, Janos Demeter, Miguel G. Knight, Rachel E. Turn, Laura S. Rojas-Hernandez, Chengjin Ye, Kevin Chiem, Judy Shon, Luis Martinez-Sobrido, Carolyn R. Bertozzi, Garry P. Nolan, Jayakar V. Nayak, Carlos Milla, Raul Andino, and Peter K. Jackson**

**Table S1.** Nasal tissue donor characteristics, related to Figure 1-7, and S1-7.

| Donor | Sex    | Age | COVID-19 |
|-------|--------|-----|----------|
| 1     | Male   | 33  | Negative |
| 2     | Male   | 42  | Negative |
| 3     | Female | 31  | Negative |
| 4     | Male   | 69  | Negative |
| 5     | Female | 28  | Negative |
| 6     | Female | 41  | Negative |
| 7     | Male   | 42  | Negative |
| 8     | Male   | 56  | Negative |
