# Supplementary material
Source: PubMed Central journal article supplement (PMC9715480)
Supplement: mmc2.pdf [file mmc2.pdf]

**Table S2.** Nasal tissue donor with primary ciliary dyskinesia (PCD) characteristics, related to Figure 6, and S6.

| Donor | Gender | Sex  | Mutation | Allele 1           | Allele 2           | COVID-19 |
|-------|--------|------|----------|--------------------|--------------------|----------|
| 1     | Female | 36 y | DNAI2    | c.527_529delins39  | c.527_529del ins39 | Negative |
| 2     | Female | 6 m  | DNAH11   | c.7904_7914+643del | c.7904_7914+643del | Negative |
| 3     | Female | 3 y  | DNAH5    | c.10815del         | c.13309del         | Negative |
